# Supplementary material for: Ameliorating effects and mechanisms of transcutaneous auricular vagal nerve stimulation on abdominal pain and constipation
Source: JCI journal article supplement (doi:10.1172/jci.insight.150052), 2021-06-17
Supplement: sd1 [file 1]

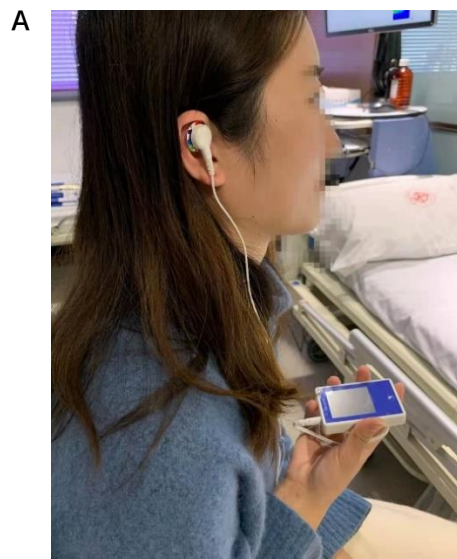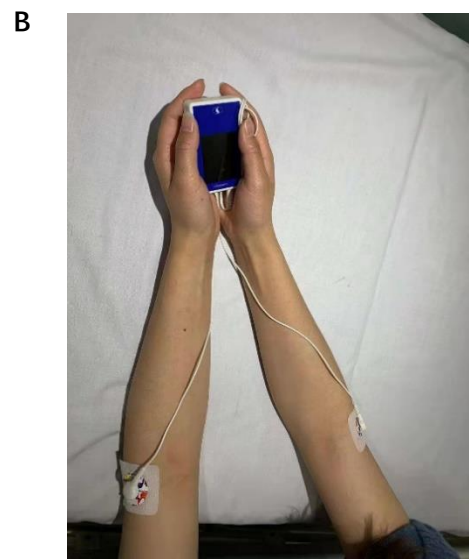

**Supplementary Figure 1.** taVNS at bilateral cymba concha (A) and sham-taVNS at bilateral elbow area (B). One pair of surface ECG electrodes was applied at stimulation sites. A watch-size digital stimulator was used to deliver electrical stimulation. taVNS, transcutaneous auricular vagal nerve stimulation.
